# Supplementary material for: Circulating Long Noncoding RNAs Positively Correlate with the Increased Risk, Elevated Severity and Unfavorable Prognosis in the Sepsis Patients
Source: Research Square preprint supplement (doi:10.21203/rs.3.rs-1131221/v1), 2022-01-03
Supplement: Supplementary file 1 [file 7c72e893c546f07fe405ce77.docx]

**Table S1. Differentially expressed long noncoding RNAs in rat sepsis models**

| *Gene ID* | *Regulation* | *log2Fold change* | *Gene chromosome* | *Gene length* | *Gene strand* |
| --- | --- | --- | --- | --- | --- |
| *BGIG10116_33784* | *Up* | *1.520363261* | *NC_005112.4* | *3598* | *-* |
| *BGIG10116_33026* | *Up* | *8.388017285* | *NC_005108.4* | *879* | *-* |
| *BGIG10116_32666* | *Up* | *1.675283108* | *NC_005107.4* | *492* | *+* |
| *BGIG10116_34708* | *Up* | *3.474602053* | *NC_005118.4* | *768* | *+* |
| *BGIG10116_36070* | *Up* | *2.959540393* | *NC_005113.4* | *1422* | *-* |
| *LOC103689920* | *Up* | *5.95419631* | *NC_005109.4* | *9991* | *-* |
| *LOC108351961* | *Up* | *4.321928095* | *NC_005108.4* | *20092* | *+* |
| *BGIG10116_34003* | *Up* | *6.857980995* | *NC_005114.4* | *716* | *+* |
| *BGIG10116_31593* | *Up* | *3.807354922* | *NC_005103.4* | *3228* | *+* |
| *LOC108351973* | *Up* | *5.977279923* | *NC_005108.4* | *4323* | *-* |
| *LOC108350126* | *Up* | *2.768759677* | *NC_005101.4* | *6366* | *-* |
| *BGIG10116_31680* | *Up* | *3.098032083* | *NC_005103.4* | *1600* | *-* |
| *LOC108351556* | *Up* | *1.193879734* | *NC_005106.4* | *1742* | *-* |
| *BGIG10116_34985* | *Up* | *3.037577458* | *NC_005120.4* | *452* | *+* |
| *LOC102547955* | *Up* | *3.247927513* | *NC_005109.4* | *26882* | *+* |
| *LOC100909803* | *Up* | *1.264257547* | *NC_005108.4* | *7187* | *-* |
| *BGIG10116_31885* | *Up* | *7.366322214* | *NC_005104.4* | *1404* | *+* |
| *BGIG10116_33282* | *Up* | *5.444218525* | *NC_005109.4* | *526* | *-* |
| *LOC103691247* | *Up* | *3.239465935* | *NC_005100.4* | *3543* | *+* |
| *BGIG10116_33936* | *Up* | *2.427748551* | *NC_005113.4* | *1485* | *-* |
| *LOC102551978* | *Up* | *3.513490746* | *NC_005109.4* | *3440* | *-* |
| *LOC108350509* | *Up* | *5.906890596* | *NC_005102.4* | *5288* | *-* |
| *BGIG10116_34520* | *Up* | *2.039528364* | *NC_005117.4* | *2708* | *+* |
| *LOC102555118* | *Up* | *2.779609932* | *NC_005101.4* | *10717* | *+* |
| *BGIG10116_34887* | *Up* | *2.553451528* | *NC_005119.4* | *2686* | *-* |
| *BGIG10116_31586* | *Up* | *1.307734213* | *NC_005103.4* | *2359* | *+* |
| *BGIG10116_32090* | *Up* | *2.03562391* | *NC_005105.4* | *14759* | *+* |
| *BGIG10116_35430* | *Up* | *5.832890014* | *NC_005103.4* | *7223* | *+* |
| *LOC680254* | *Up* | *4.125530882* | *NC_005112.4* | *6626* | *+* |
| *BGIG10116_35645* | *Down* | *-4.057030945* | *NC_005105.4* | *338* | *+* |
| *LOC102556643* | *Down* | *-1.22532324* | *NC_005101.4* | *40649* | *+* |
| *BGIG10116_31155* | *Down* | *-3.906890596* | *NC_005101.4* | *864* | *-* |
| *LOC102554879* | *Down* | *-5.95419631* | *NC_005111.4* | *8944* | *-* |
| *BGIG10116_31581* | *Down* | *-1.986060809* | *NC_005103.4* | *6329* | *+* |
| *LOC103694060* | *Down* | *-6.918863237* | *NC_005116.4* | *12748* | *-* |
| *BGIG10116_33338* | *Down* | *-5.111508315* | *NC_005109.4* | *756* | *-* |
| *BGIG10116_32475* | *Down* | *-2.874469118* | *NC_005106.4* | *2563* | *+* |
| *LOC102553345* | *Down* | *-4.087462841* | *NC_005119.4* | *48299* | *-* |
| *LOC102552786* | *Down* | *-3.620941798* | *NC_005104.4* | *2911* | *-* |
| *LOC108349248* | *Down* | *-2.686500527* | *NC_005100.4* | *16883* | *+* |
| *BGIG10116_30753* | *Down* | *-6.599912842* | *NC_005101.4* | *1505* | *+* |
| *LOC108348840* | *Down* | *-4* | *NC_005117.4* | *14647* | *+* |
| *LOC102548966* | *Down* | *-1.617383978* | *NC_005111.4* | *4332* | *-* |
| *LOC102552722* | *Down* | *-7.918863237* | *NC_005102.4* | *16658* | *+* |
| *LOC108351029* | *Down* | *-7.499845887* | *NC_005104.4* | *8369* | *-* |
| *BGIG10116_31580* | *Down* | *-7.409390936* | *NC_005103.4* | *975* | *+* |
| *LOC102551171* | *Down* | *-6.906890596* | *NC_005103.4* | *13685* | *+* |
| *LOC102553416* | *Down* | *-6.794415866* | *NC_005103.4* | *12437* | *-* |
| *LOC102551973* | *Down* | *-6.426264755* | *NC_005107.4* | *2939* | *+* |
| *BGIG10116_32082* | *Down* | *-6.392317423* | *NC_005105.4* | *1214* | *+* |
| *LOC100910558* | *Down* | *-6.375039431* | *NC_005104.4* | *37673* | *+* |
| *BGIG10116_33049* | *Down* | *-6.189824559* | *NC_005108.4* | *1400* | *-* |
| *LOC102552371* | *Down* | *-6.189824559* | *NC_005109.4* | *42693* | *+* |
| *LOC102553396* | *Down* | *-6.14974712* | *NC_005105.4* | *5795* | *+* |
| *LOC108349540* | *Down* | *-5.754887502* | *NC_005100.4* | *5434* | *-* |
| *BGIG10116_35321* | *Down* | *-5.247927513* | *NC_005101.4* | *4605* | *-* |
| *LOC103692390* | *Down* | *-4.754887502* | *NC_005104.4* | *96334* | *+* |
| *LOC108349194* | *Down* | *-4.754887502* | *NC_005100.4* | *13680* | *-* |
| *BGIG10116_33135* | *Down* | *-4.091498354* | *NC_005109.4* | *749* | *+* |
| *LOC102554007* | *Down* | *-3.906890596* | *NC_005108.4* | *9466* | *-* |
| *LOC102554481* | *Down* | *-3.364940984* | *NC_005103.4* | *55529* | *+* |
| *LOC102553528* | *Down* | *-2.032421478* | *NC_005100.4* | *6160* | *-* |
| *LOC102547728* | *Down* | *-1.862496476* | *NC_005103.4* | *7324* | *+* |

**Table S2. The homologous genes information of up-regulated genes in rat sepsis models**

| *Rat Gene ID* | *Regulation* | *Homology* | *Human Gene ID* | *lncRNA/mRNA* |
| --- | --- | --- | --- | --- |
| *BGIG10116_33784* | *Up* | *no* | */* | */* |
| *BGIG10116_33026* | *Up* | *no* | */* | */* |
| *BGIG10116_32666* | *Up* | *no* | */* | */* |
| *BGIG10116_34708* | *Up* | *no* | */* | */* |
| *BGIG10116_36070* | *Up* | *no* | */* | */* |
| *LOC103689920* | *Up* | *yes* | *ENST00000398844.7* | *mRNA* |
| *LOC108351961* | *Up* | *no* | */* | */* |
| *BGIG10116_34003* | *Up* | *no* | */* | */* |
| *BGIG10116_31593* | *Up* | *no* | */* | */* |
| *LOC108351973* | *Up* | *no* | */* | */* |
| *LOC108350126* | *Up* | *yes* | *ENST00000645056.1* | *lncRNA* |
| *BGIG10116_31680* | *Up* | *no* | */* | */* |
| *LOC108351556* | *Up* | *yes* | *ENST00000663863.1* | *lncRNA* |
| *BGIG10116_34985* | *Up* | *no* | */* | */* |
| *LOC102547955* | *Up* | *yes* | *ENST00000376741.5* | *mRNA* |
| *LOC100909803* | *Up* | *yes* | *ENST00000397944.8* | *mRNA/* |
| *BGIG10116_31885* | *Up* | *no* | */* | */* |
| *BGIG10116_33282* | *Up* | *no* | */* | */* |
| *LOC103691247* | *Up* | *no* | */* | */* |
| *BGIG10116_33936* | *Up* | *no* | */* | */* |
| *LOC102551978* | *Up* | *yes* | *ENST00000676570.1* | *mRNA* |
| *LOC108350509* | *Up* | *yes* | *ENST00000618318.1* | *mRNA* |
| *BGIG10116_34520* | *Up* | *no* | */* | */* |
| *LOC102555118* | *Up* | *no* | */* | */* |
| *BGIG10116_34887* | *Up* | *no* | */* | */* |
| *BGIG10116_31586* | *Up* | *no* | */* | */* |
| *BGIG10116_32090* | *Up* | *no* | */* | */* |
| *BGIG10116_35430* | *Up* | *no* | */* | */* |
| *LOC680254* | *Up* | *no* | */* | */* |
